# Supplementary material
Source: PubMed Central journal article supplement (PMC3736832)

**Figure S1**

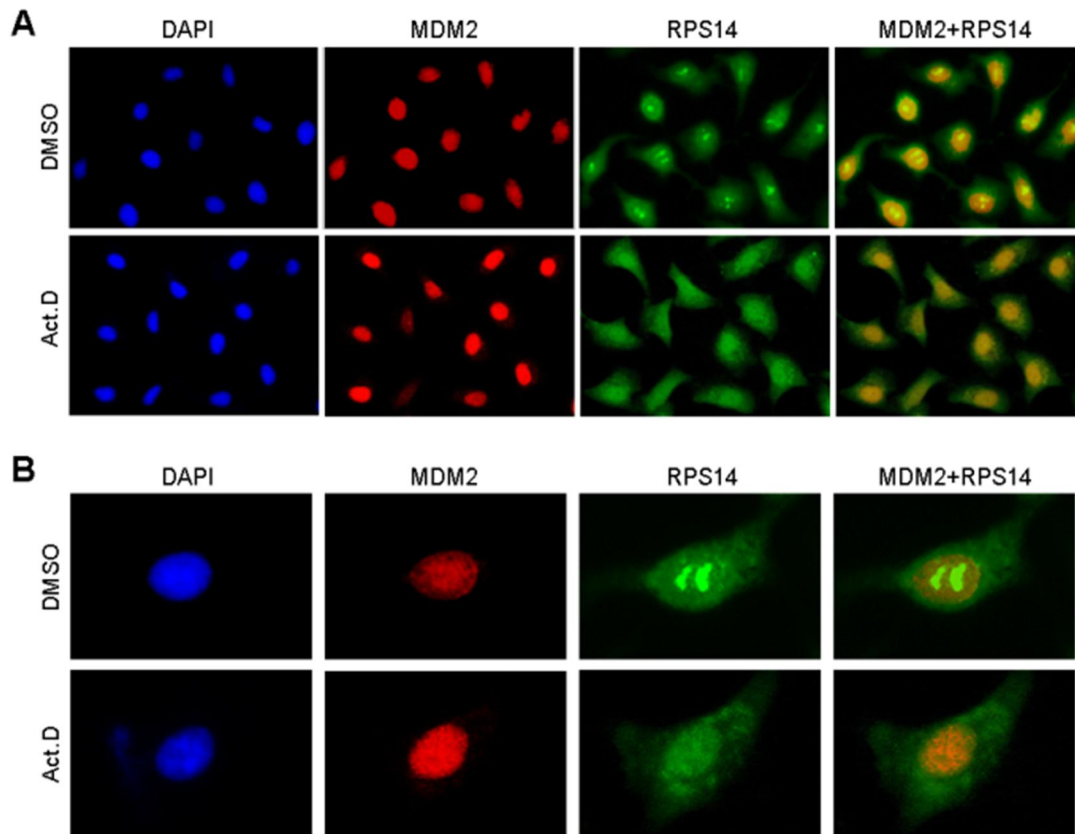

**Figure S2**

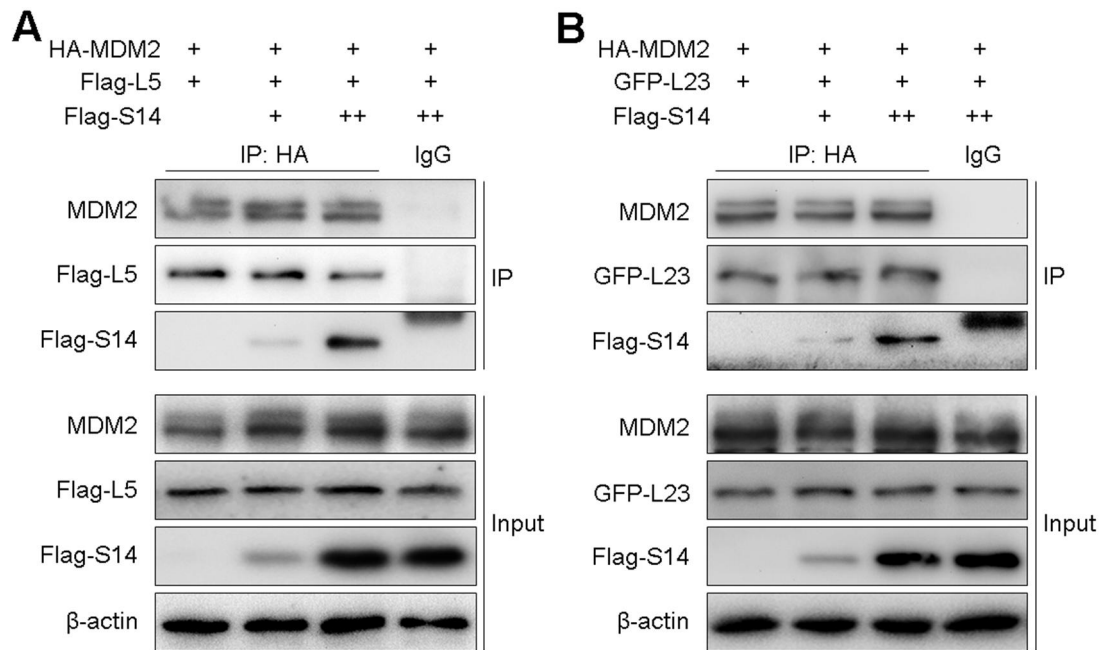

**Figure S3**

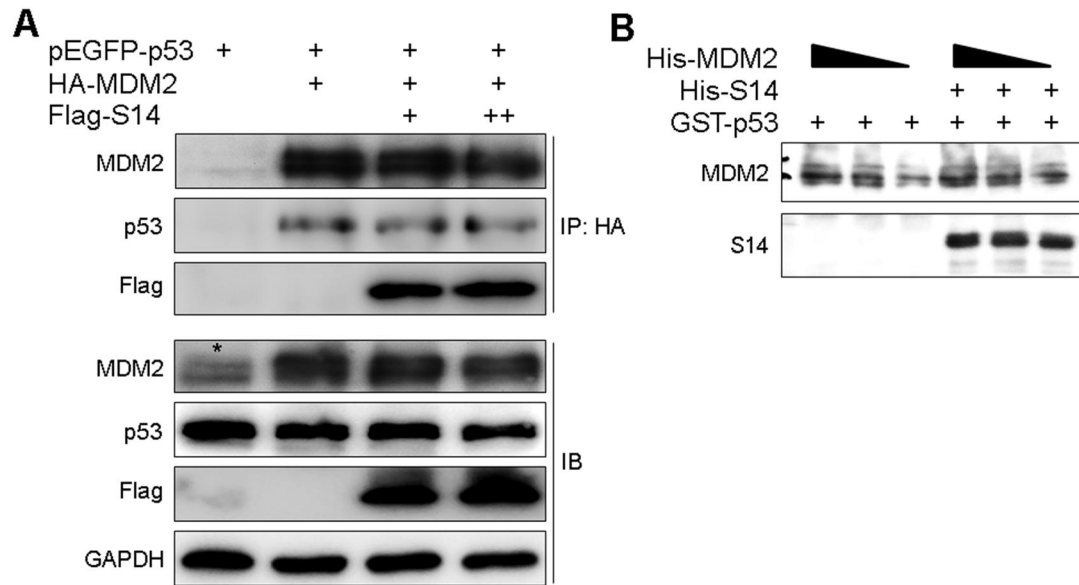

**Figure S4**

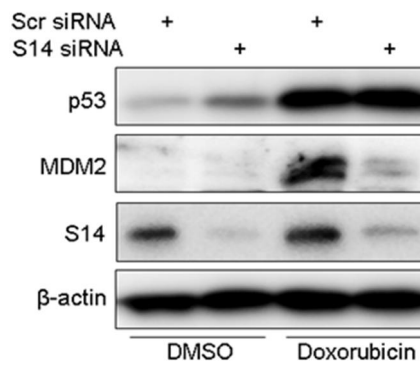

**Figure S5**

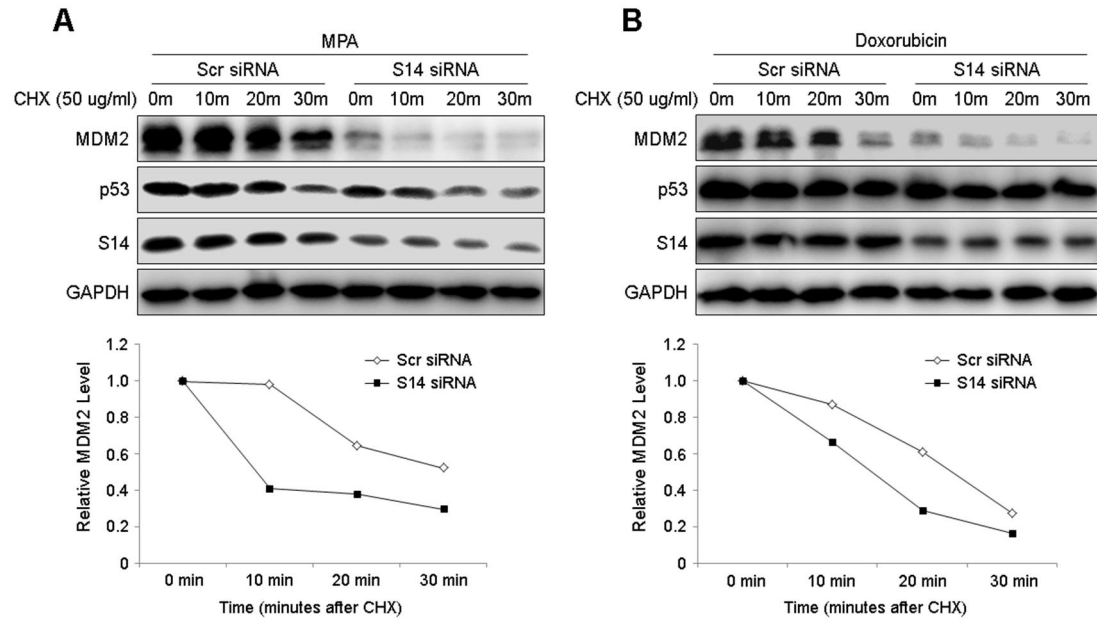

**Figure S6**

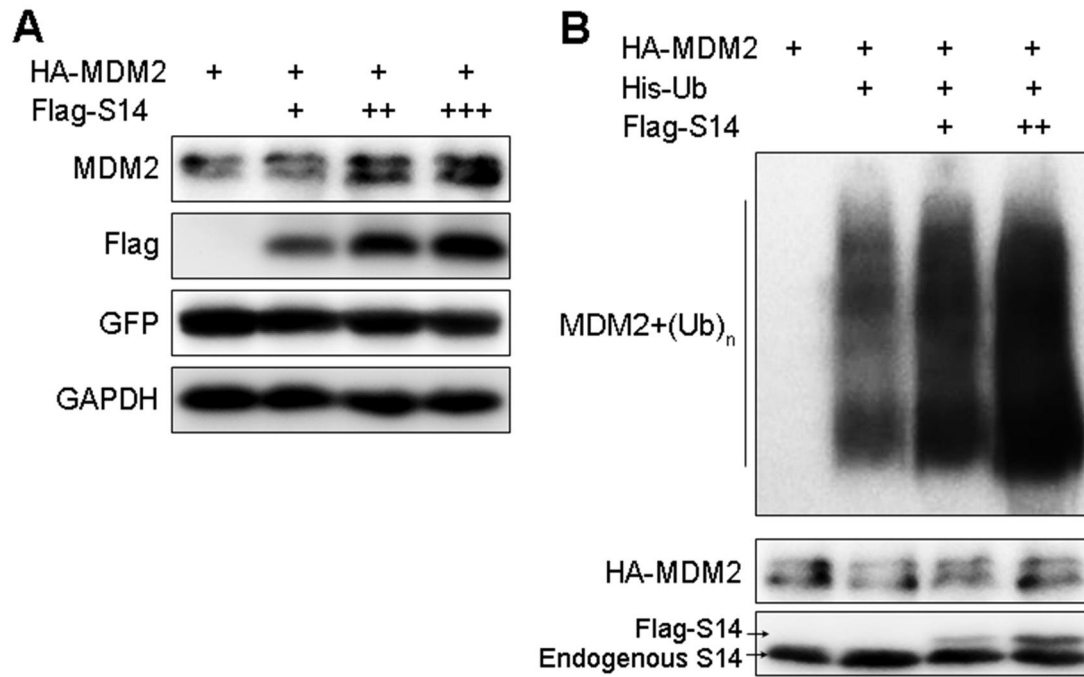

Supplement: NIHMS488217-supplement-Figs__S1-S6.pdf [file NIHMS488217-supplement-Figs__S1-S6.pdf]
